# Supplementary material for: Allele-Specific Gene Editing Rescues Pathology in a Human Model of Charcot-Marie-Tooth Disease Type 2E
Source: PubMed Central journal article supplement (PMC8415563; doi:10.3389/fcell.2021.723023), 2021-08-16
Supplement: Data_Sheet_1.pdf [file Data_Sheet_1.pdf]

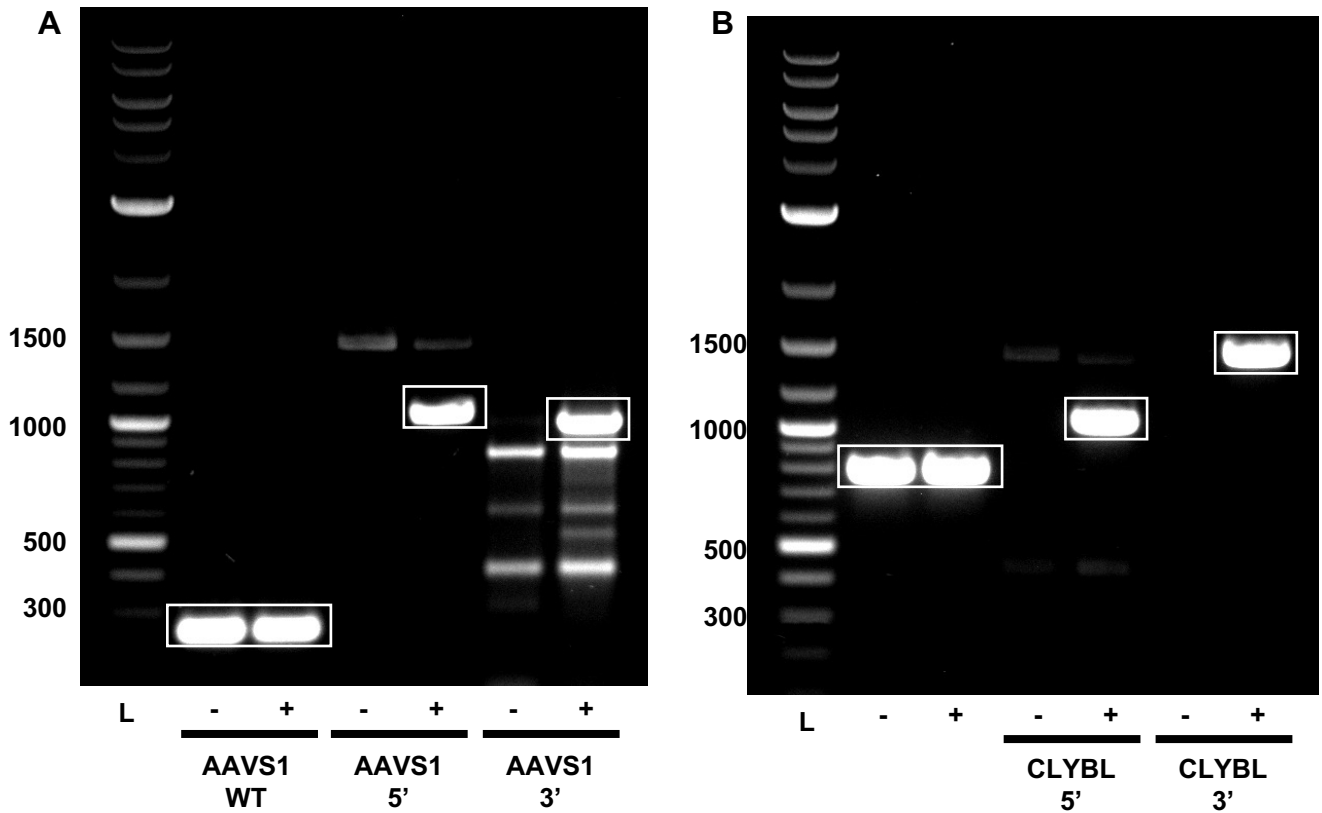

**Supplementary Figure S1: Confirmation of targeted integration of hNIL cassette in iPSC lines.** PCR assays were designed to amplify the unmodified AAVS1 or CLYBL locus (WT) as well as the left (5') and right (3') integration junctions. Genomic DNA from unmodified iPSC (-) was compared to genomic DNA from clonal lines isolated after transfection with TALENs and hNIL vector (+). L = ladder. (A) AAVS1 integration of hNIL in CMT2E-N98S line. (B) CLYBL integration of hNIL in the WT line. Boxes indicate amplicon products matching the expected size for each assay as follows:

WT AAVS1 = 254 bp  
 AAVS1 hNIL 5' junction = 992 bp  
 AAVS1 hNIL 3' junction = 989 bp  
 WT CLYBL = 790 bp  
 CLYBL hNIL 5' junction = 1032 bp  
 CLYBL hNIL 3' junction = 1470 bp

**A**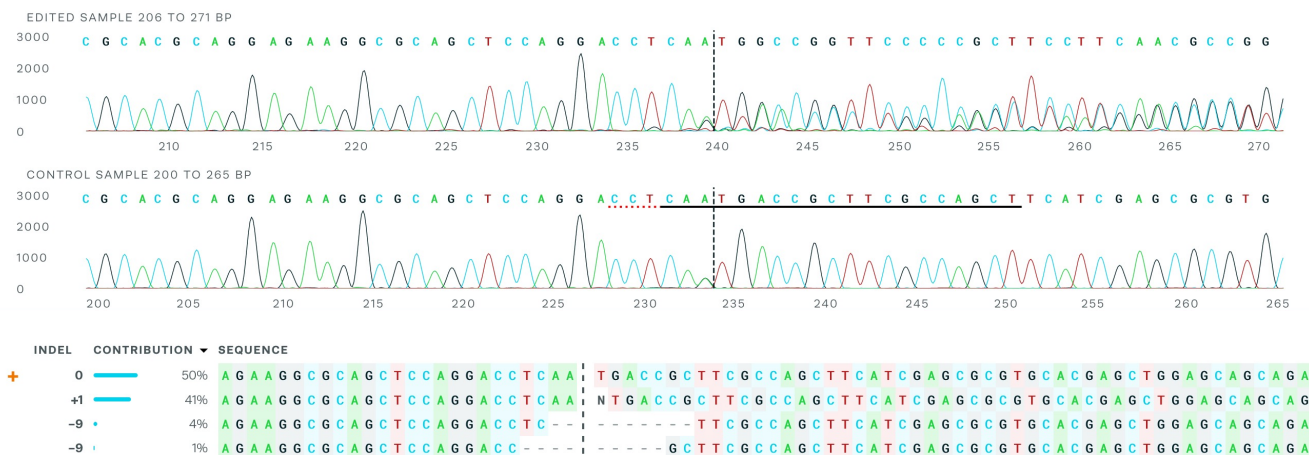**B**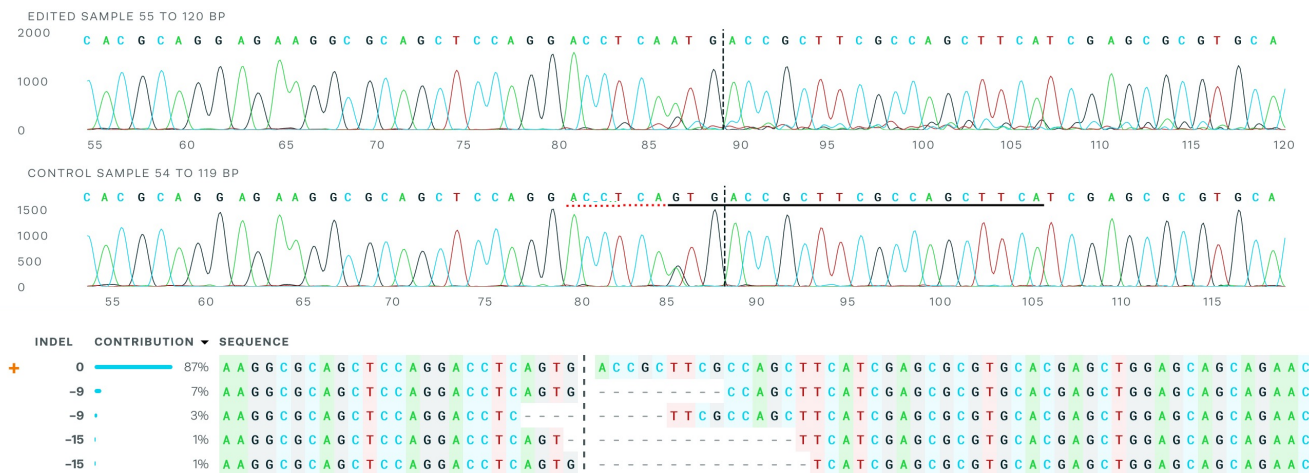

**Supplementary Figure S2: Example ICE analyses for editing with Sp. and Sa.KKH Cas9.** Sequencing chromatograms from individual representative samples edited with Sp.HiFi (A) and Sa.KKH Cas9 (B) are shown along with unedited controls. The gRNA target sequences are indicated with black solid underlines, PAM sequences with red dotted underlines, and predicted cut sites with vertical dashed lines. The identities of various detected indel outcomes are shown below, with contribution as a percentage of all alleles. Unedited alleles are marked with an orange +.

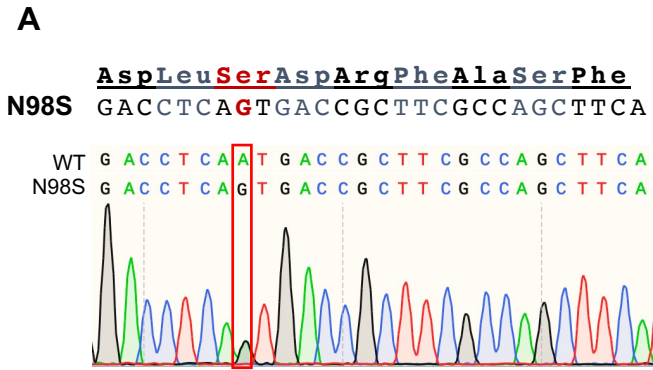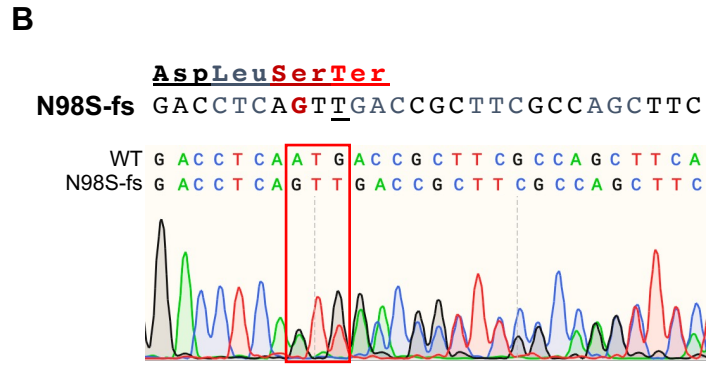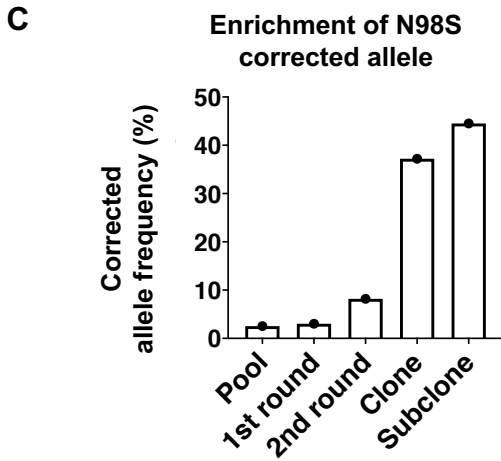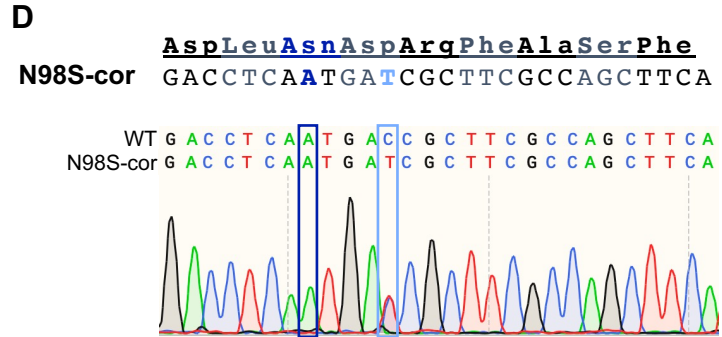

**Supplementary Figure S3: Isolation and genotyping of edited CMT2E-N98S iPSC lines.** (A) Sequence of N98S mutant allele. Sequencing chromatogram below from *NEFL*-N98S iPSC line with the heterozygous N98S mutation boxed in red. (B) Sequence of N98S-fs allele demonstrating insertion of one extra thymidine nucleotide (T) leading to immediate nonsense codon (Ter). Sequencing chromatogram from the N98S-fs clone below, with the site of mutation and +1bp insertion boxed in red. (C) Serial sib selection led to enrichment of the N98S corrected (N98S-cor) allele, followed by manual clone picking. (D) Sequence of N98S-cor allele with G->A substitution to correct disease mutation along with C->T silent mutation to facilitate genotyping. Sequencing chromatogram from the N98S-cor clone below, with the corrected mutation site boxed in dark blue and the silent SNP boxed in light blue.

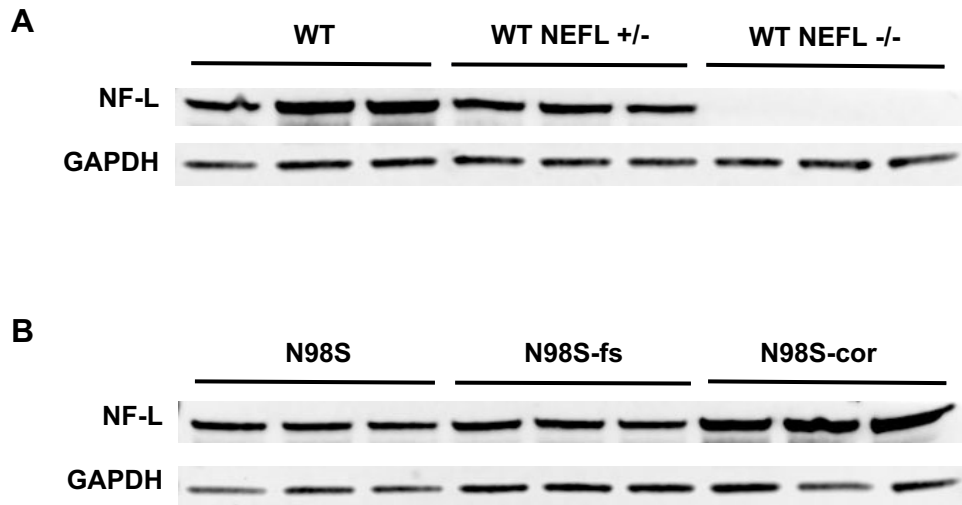

**Supplementary Figure S4: Western blots for quantification of NF-L protein levels.** Total protein was extracted from day 10 *i*<sup>3</sup>LMNs, blots probed with anti-neurofilament light (NF-L) and anti-GAPDH antibodies. Quantification is shown in figure 4. (A) Samples derived from healthy control (WT) neurons and isogenic lines with heterozygous or homozygous deletion of *NEFL*. (B) Samples derived from CMT2E N98S neurons and isogenic lines edited with frameshift mutation of the N98S allele (N98S-fs) or correction of N98S to wild type sequence (N98S-cor).



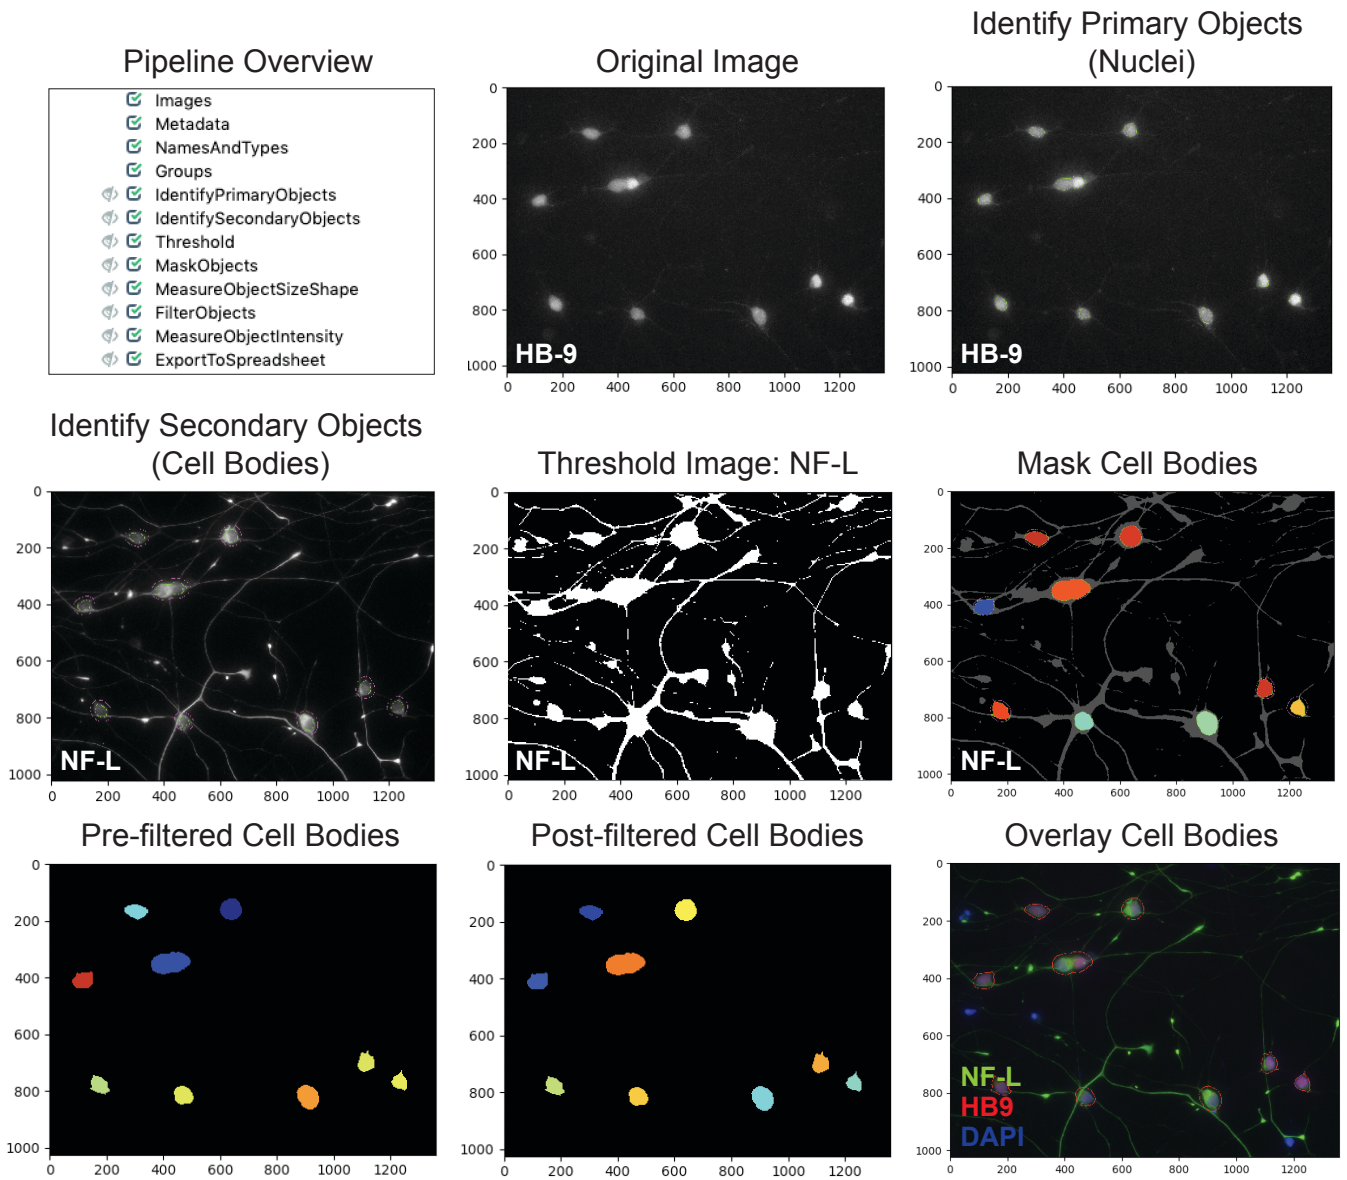

**Supplementary Figure S5: CellProfiler pipeline for quantification of NF-L fluorescence intensity in motor neuron cell bodies.** HB9+ nuclei (primary objects) were identified. Cell bodies (secondary objects) were identified by extending the area of HB9+ radially by 15 pixels. The image with NF-L staining was thresholded and used to mask the cell bodies to exclude areas containing only background. The cell bodies were then filtered by shape and compactness to remove any incorrectly identified objects. The average NF-L intensity of the cell bodies was measured.

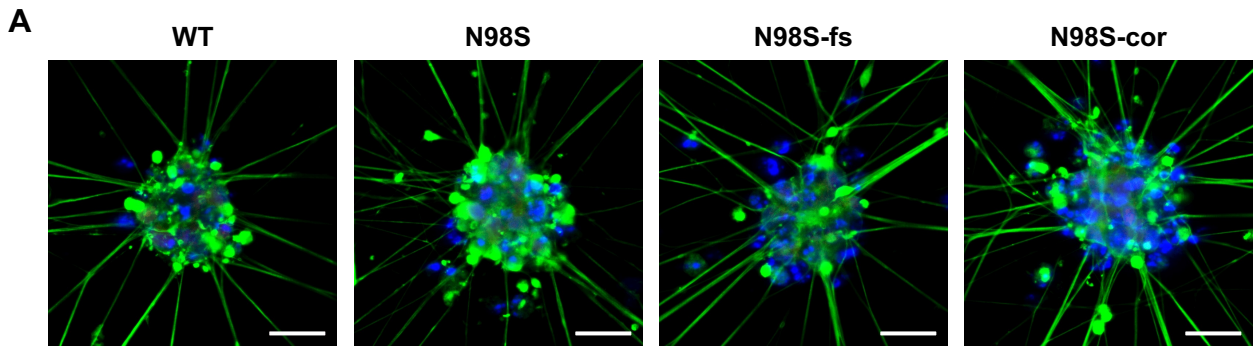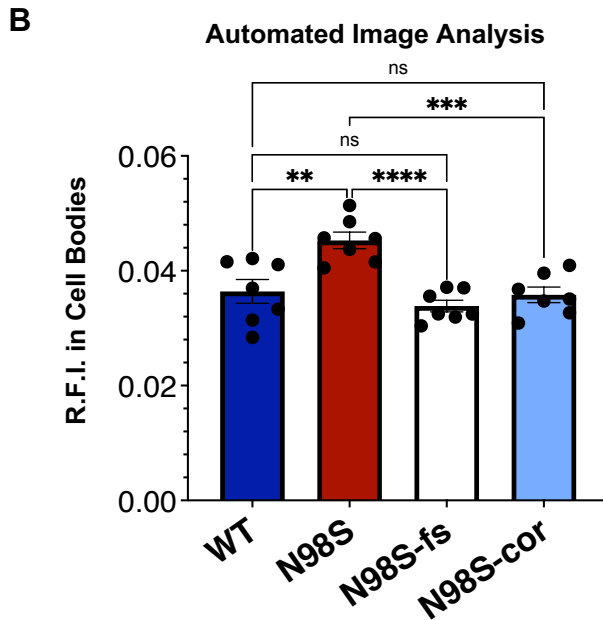

**Supplementary Figure S6: Quantification of NF-L fluorescence intensity in motor neuron cell bodies at day 14.** (A) Representative images of day-14 neurons stained with NF-L (green), HB9 (red), DAPI (blue). Scale bars = 25  $\mu$ m. (B) Quantification of NF-L relative fluorescence intensity (R.F.I.) in HB9+ cell bodies using automated image analysis pipeline. Data points represent mean values from independent differentiations. Bars indicate mean of all samples +/- S.E.M. ns = not significant, \*\*  $p < 0.005$ , \*\*\*  $p < 0.001$ , \*\*\*\*  $p < 0.0001$  by one-way ANOVA with Šídák's test for multiple comparisons.

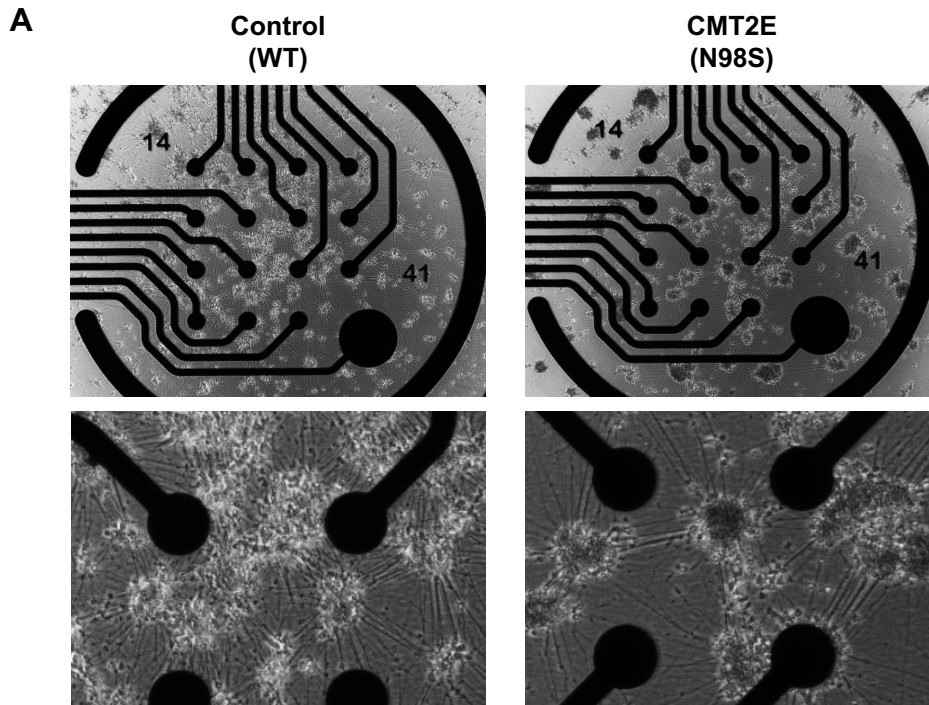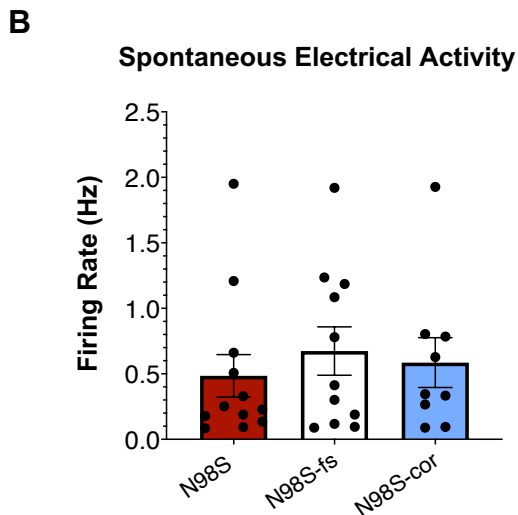

**Supplementary Figure S7: Gene editing does not disrupt spontaneous electrical activity in CMT2E neurons.** (A) Representative images of MEA plates with WT control and CMT2E neurons used for data shown in Fig. 1. Images were acquired on differentiation day 14. (B) Comparison of spontaneous electrical activity in N98S and edited N98S-fs and N98S-cor *i*<sup>3</sup>LMN measured by mean firing rate of action potentials detected by MEA. Cells were seeded on MEA plates on differentiation day 3 and recordings were obtained on differentiation day 14. Each data point represents the weighted firing rate from an individual well, bars represent mean of all wells +/- S.E.M. There was no significance difference between cell lines by one-way ANOVA.



## Pipeline Overview

|                                     |                           |
|-------------------------------------|---------------------------|
| <input checked="" type="checkbox"/> | Images                    |
| <input checked="" type="checkbox"/> | Metadata                  |
| <input checked="" type="checkbox"/> | NamesAndTypes             |
| <input checked="" type="checkbox"/> | Groups                    |
| <input checked="" type="checkbox"/> | EnhanceOrSuppressFeatures |
| <input checked="" type="checkbox"/> | EnhanceOrSuppressFeatures |
| <input checked="" type="checkbox"/> | IdentifyPrimaryObjects    |
| <input checked="" type="checkbox"/> | MaskImage                 |
| <input checked="" type="checkbox"/> | Threshold                 |
| <input checked="" type="checkbox"/> | ConvertImageToObjects     |
| <input checked="" type="checkbox"/> | MeasureImageAreaOccupied  |
| <input checked="" type="checkbox"/> | ExportToSpreadsheet       |

## Original Image

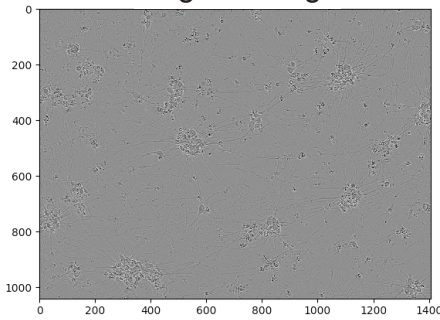

## Enhance Neurites

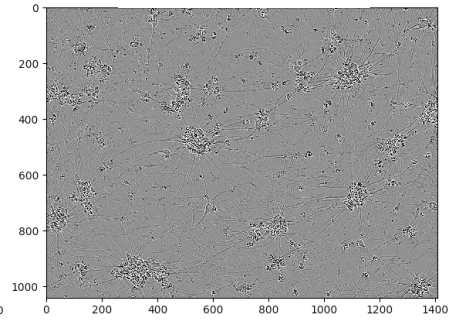

## Enhance Cell Bodies

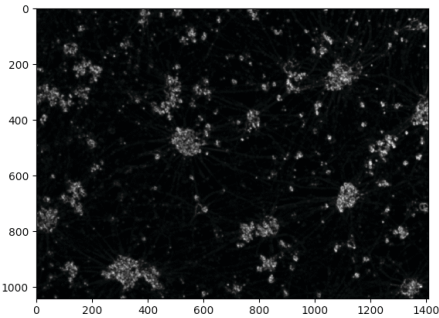

## Identify Primary Objects (Cell Bodies)

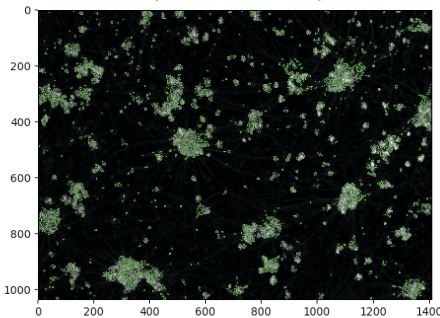

## Mask Image with Cell Bodies

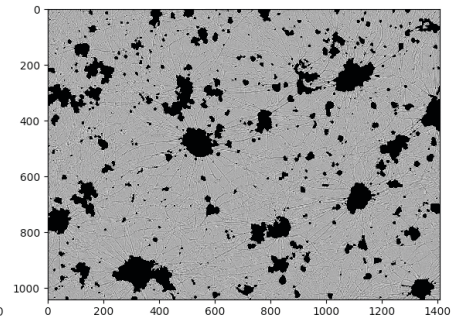

## Threshold Image

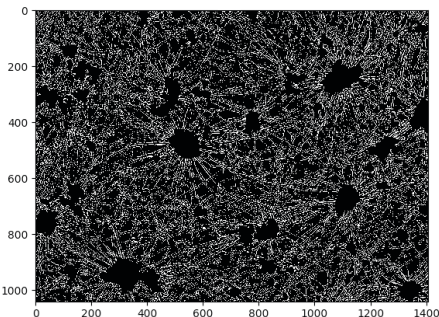

## Convert Thresholded Image to Objects (Neurites)

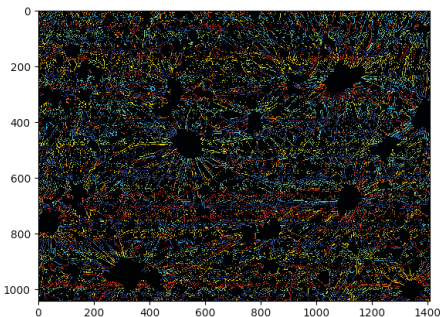

## Overlay Neurites

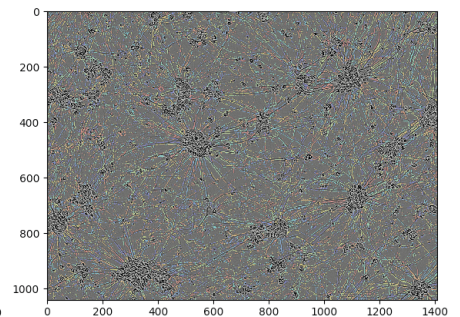

**Supplementary Figure S8: CellProfiler pipeline for quantification of neurite density.** Neurites and cell bodies were enhanced by the EnhanceOrSuppressFeatures module. Cell bodies were identified and removed from the image. The image was thresholded to distinguish the neurites from the background. The thresholded image was then used to identify the neurites as objects. The total area occupied by the neurites was measured. NF-L protein levels in media assessed by ELISA assay were normalized to the measurement of neurite density to correct for well-to-well variability in cell density.
